# Supplementary material for: Aqueous Extract of Psiloxylon mauritianum, Rich in Gallic Acid, Prevents Obesity and Associated Deleterious Effects in Zebrafish
Source: MDPI journal article supplement (doi:10.3390/antiox11071309), 2022-06-30
Supplement: s1 [file s1]

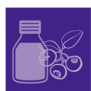

## Supplementary Material: Aqueous Extract of *Psiloxylon mauritianum*, Rich in Gallic Acid, Prevents Obesity and Associated Deleterious Effects in Zebrafish

Batoul Ghaddar <sup>1</sup>, Laura Gence <sup>1,†</sup>, Bryan Veeren <sup>1,†</sup>, Matthieu Bringart <sup>1</sup>, Jean-Loup Bascands <sup>1</sup>, Olivier Meilhac <sup>1,2</sup> and Nicolas Diotel <sup>1,\*</sup>

<sup>1</sup> Université de La Réunion, INSERM, UMR 1188, Diabète Athérombose Thérapies Réunion Océan Indien (DéTROi), Saint-Denis, 97400 La Réunion, France; batoul.ghaddar@univ-reunion.fr (B.G.); laura.gence@univ-reunion.fr (L.G.); bryan.veeren@univ-reunion.fr (B.V.); matthieu.bringart@inserm.fr (M.B.); jean-loup.bascands@inserm.fr (J.-L.B.); olivier.meilhac@univ-reunion.fr (O.M.)

<sup>2</sup> CHU de La Réunion, Saint-Denis, 97400, La Réunion, France

\* Correspondence: nicolas.diotel@univ-reunion.fr

† These authors contribute equally to this work.

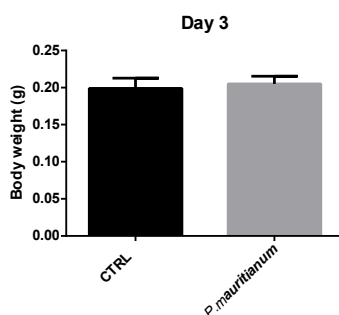

### Supplementary Figure S1: Body weight of CTRL and *P. mauritianum* treated fish

After three days of treatment with water (CTRL) or *P. mauritianum* (0.25 g/L), no significant change in the body weight of CTRL and *P. mauritianum* treated fish was observed.

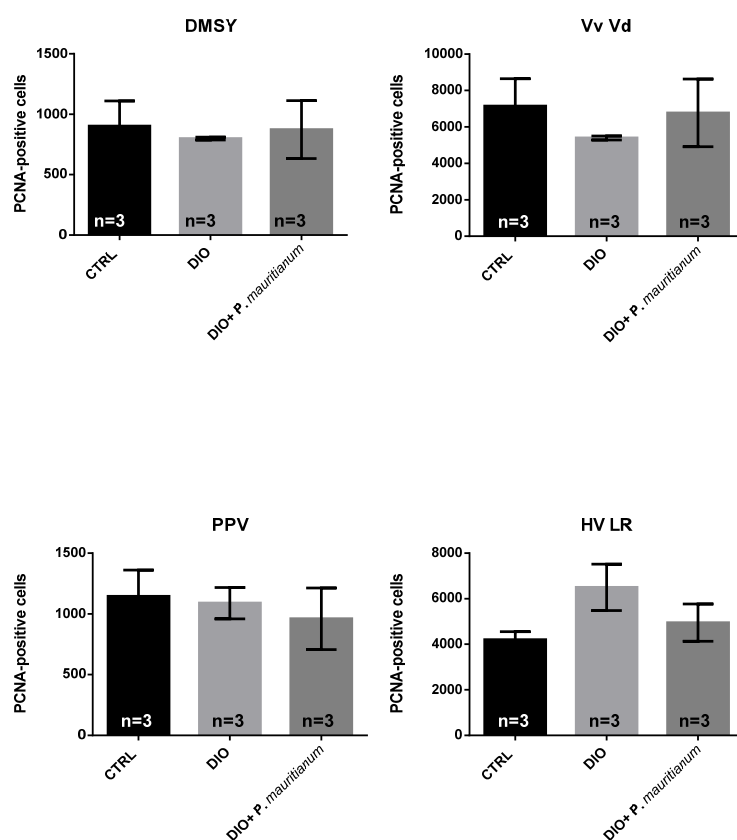

### Supplementary Figure S2: Bran cell proliferation in the main neurogenic niches

In the therapeutic protocol, neurogenesis was not different between control, DIO and DIO + *P. mauritianum* at week 2 of the experiment for CTRL, DIO, DIO+ *P. mauritianum* treated fish in the main neurogenic niches studied.
